# Supplementary material for: Comprehensive Evaluation of 24 Red Raspberry Varieties in Northeast China Based on Nutrition and Taste
Source: MDPI journal article supplement (doi:10.3390/foods11203232), 2022-10-16
Supplement: s1 [file s1]

Table S1. Eigenvalue, variance contribution rate and cumulative variance contribution rate of the 7 principal components.

| Indexes                                   | PC1    | PC2    | PC3    | PC4    | PC5    | PC6    | PC7    |
|-------------------------------------------|--------|--------|--------|--------|--------|--------|--------|
| l-Rhamnose monohydrate                    | -0.016 | -0.605 | -0.309 | -0.070 | -0.314 | 0.091  | 0.315  |
| Fructose                                  | -0.360 | -0.722 | 0.188  | 0.043  | 0.063  | 0.008  | 0.226  |
| Glucose                                   | -0.024 | -0.860 | 0.388  | -0.085 | -0.066 | 0.033  | -0.200 |
| Sucrose                                   | 0.773  | 0.223  | -0.393 | -0.246 | 0.022  | 0.025  | 0.070  |
| Maltose                                   | 0.417  | -0.053 | -0.473 | -0.593 | 0.130  | 0.107  | -0.011 |
| d-Trehalose anhydrous                     | -0.210 | -0.167 | -0.204 | -0.238 | 0.389  | -0.174 | -0.727 |
| Oxalic acid                               | -0.199 | -0.190 | -0.416 | -0.045 | -0.507 | -0.565 | -0.180 |
| Tartaric acid                             | -0.134 | -0.015 | -0.046 | 0.320  | -0.648 | -0.474 | -0.300 |
| Malic acid                                | -0.399 | -0.382 | -0.735 | -0.229 | 0.015  | 0.021  | -0.097 |
| $\alpha$ -Ketoglutaric acid               | 0.240  | 0.058  | -0.441 | -0.193 | -0.543 | 0.336  | -0.309 |
| Lactic acid                               | 0.378  | -0.056 | -0.254 | -0.637 | -0.292 | 0.336  | -0.134 |
| Citric acid                               | -0.898 | -0.127 | -0.248 | 0.149  | 0.096  | 0.195  | 0.026  |
| Fumaric acid                              | -0.211 | -0.389 | -0.144 | 0.027  | 0.592  | -0.392 | 0.021  |
| Succinic acid                             | -0.063 | 0.346  | 0.605  | -0.341 | -0.027 | 0.017  | -0.082 |
| Total sugar                               | 0.360  | -0.666 | 0.051  | -0.409 | 0.034  | 0.066  | 0.006  |
| Reducing sugar                            | -0.230 | -0.643 | 0.517  | -0.264 | -0.282 | -0.047 | -0.027 |
| TAC                                       | -0.927 | -0.113 | -0.233 | 0.059  | -0.026 | 0.141  | -0.029 |
| SAR                                       | 0.906  | 0.064  | -0.093 | -0.107 | 0.107  | -0.326 | 0.017  |
| SSC                                       | 0.271  | -0.551 | -0.535 | -0.049 | 0.131  | -0.197 | 0.126  |
| pH                                        | 0.947  | 0.031  | 0.101  | -0.155 | 0.057  | -0.171 | -0.039 |
| Moisture                                  | -0.389 | 0.577  | 0.091  | -0.344 | -0.201 | -0.142 | -0.148 |
| Length                                    | -0.598 | 0.497  | 0.120  | -0.500 | -0.006 | -0.219 | 0.008  |
| Diameter                                  | -0.851 | 0.056  | -0.231 | -0.287 | 0.137  | -0.013 | 0.004  |
| Weight                                    | -0.696 | 0.342  | -0.154 | -0.450 | -0.036 | -0.039 | 0.147  |
| Ascorbic acid                             | 0.085  | 0.003  | -0.398 | 0.717  | 0.174  | 0.088  | -0.197 |
| TPC                                       | -0.024 | -0.860 | 0.388  | -0.085 | -0.066 | 0.033  | -0.200 |
| Eigenvalue                                | 6.776  | 4.802  | 3.162  | 2.675  | 1.902  | 1.294  | 1.118  |
| Variance contribution rate (%)            | 26.06  | 18.47  | 12.16  | 10.287 | 7.316  | 4.975  | 4.299  |
| Cumulative variance contribution rate (%) | 26.06  | 44.53  | 56.69  | 66.978 | 74.293 | 79.268 | 83.567 |

**Table S2. Principal component values and comprehensive evaluation indexes of 24 red raspberry varieties.**

| Varieties      | PCA    |        |        |        |        |        |        | Evaluation index value |                | Score ranking  |                |
|----------------|--------|--------|--------|--------|--------|--------|--------|------------------------|----------------|----------------|----------------|
|                | PC1    | PC2    | PC3    | PC4    | PC5    | PC6    | PC7    | Y <sub>c</sub>         | Y <sub>f</sub> | Y <sub>c</sub> | Y <sub>f</sub> |
| European red   | 1.850  | 1.623  | -0.301 | 1.205  | 1.279  | -1.649 | 0.048  | 0.883                  | 0.482          | 1              | 2              |
| Tulameen       | 0.510  | -0.798 | 0.889  | 0.422  | -0.313 | 0.506  | -0.673 | 0.110                  | 0.133          | 9              | 6              |
| Boyne          | -0.252 | 0.468  | -0.149 | 0.726  | 0.363  | 0.405  | 1.723  | 0.198                  | -0.066         | 7              | 10             |
| DNS1           | -0.334 | -0.421 | 0.523  | -0.105 | -0.573 | -0.167 | -0.950 | -0.203                 | -0.087         | 14             | 12             |
| DNS2           | -0.334 | -2.220 | -0.218 | 0.172  | 0.707  | 0.200  | 1.825  | -0.366                 | -0.087         | 23             | 12             |
| DNS4           | 0.142  | 0.692  | 3.224  | -0.966 | 0.139  | -1.049 | -0.926 | 0.376                  | 0.037          | 3              | 8              |
| DNS5           | -0.990 | 0.768  | -0.646 | -0.690 | -1.778 | 0.153  | 1.095  | -0.341                 | -0.258         | 22             | 21             |
| DNS9           | 2.230  | 1.209  | -0.366 | 0.742  | -1.038 | 1.498  | -0.370 | 0.819                  | 0.581          | 2              | 1              |
| Ruby           | -0.695 | 0.695  | 0.632  | -0.102 | -0.073 | -1.039 | 0.363  | -0.028                 | -0.181         | 12             | 18             |
| Royalty        | -0.561 | -0.666 | 0.882  | -0.231 | -0.135 | -0.100 | -0.412 | -0.218                 | -0.146         | 16             | 15             |
| Rerille        | -0.922 | 0.984  | -0.565 | -0.383 | -0.563 | -1.667 | 0.139  | -0.285                 | -0.240         | 18             | 20             |
| Nootka         | -0.789 | 0.794  | -0.192 | -0.882 | -0.372 | 0.540  | 0.841  | -0.137                 | -0.206         | 13             | 19             |
| Canby          | 1.612  | -0.479 | -0.246 | -0.775 | 1.171  | -0.178 | 0.646  | 0.327                  | 0.420          | 4              | 4              |
| Summit         | -0.351 | -0.344 | -0.573 | 0.490  | -1.720 | 0.575  | -0.749 | -0.304                 | -0.091         | 20             | 13             |
| Heritage       | -1.107 | 0.056  | -1.700 | -1.887 | 2.237  | 0.149  | -2.273 | -0.606                 | -0.288         | 24             | 22             |
| Bulgaskc       | 1.747  | -0.625 | -0.643 | -1.295 | -0.408 | 0.013  | 0.214  | 0.108                  | 0.455          | 10             | 3              |
| Samodiva       | 1.132  | -0.927 | -1.394 | -1.315 | -1.160 | -1.081 | -0.239 | -0.330                 | 0.295          | 21             | 5              |
| Schopska       | -0.678 | -1.167 | -0.251 | 0.629  | 0.590  | 0.896  | -0.018 | -0.271                 | -0.177         | 17             | 17             |
| Beijing10      | -1.127 | 0.171  | -0.337 | 1.335  | -0.862 | -0.931 | -0.488 | -0.296                 | -0.294         | 19             | 23             |
| Beijing19      | 0.038  | -1.626 | 0.665  | 0.647  | -0.367 | -1.068 | 0.192  | -0.215                 | 0.010          | 15             | 9              |
| Beijing21      | 0.281  | -0.756 | 1.346  | 0.291  | 0.706  | 1.467  | -0.308 | 0.239                  | 0.073          | 6              | 7              |
| Beijing32      | -0.467 | 1.644  | 0.637  | -1.273 | 0.280  | 2.166  | 0.836  | 0.293                  | -0.122         | 5              | 14             |
| Fertod zamatós | -0.328 | 0.382  | -0.817 | 2.111  | 0.191  | 0.884  | -1.786 | 0.084                  | -0.085         | 11             | 11             |
| Willamette     | -0.605 | 0.541  | -0.399 | 1.133  | 1.698  | -0.523 | 1.269  | 0.163                  | -0.158         | 8              | 16             |

Y<sub>c</sub>: The comprehensive quality score. Y<sub>f</sub>: The comprehensive evaluation score of fresh utilization.
